1 **Quality of Labour and Delivery Care Process**  
2 **and Associated Factors in Government**  
3 **Hospitals of Ethiopia: a multilevel analysis**

4

5 Negalign B Bayou<sup>1\*</sup>, Liz Grant<sup>2¶</sup>, Simon C Riley<sup>3¶</sup>, Elizabeth H Bradley<sup>4¶</sup>

6

7 <sup>1</sup>Department of Health Policy and Management, Institute of Health, Jimma  
8 University, Jimma, Ethiopia. E-mail: [negenu@gmail.com](mailto:negenu@gmail.com), Telephone: +251 911 824  
9 873.

10

11 <sup>2</sup>Global Health Academy, Centre for Population Health Sciences, The Usher Institute  
12 of Population Health Sciences and Informatics, Edinburgh Medical School, The  
13 University of Edinburgh, Scotland, United Kingdom. E-mail: [Liz.Grant@ed.ac.uk](mailto:Liz.Grant@ed.ac.uk),  
14 Telephone: +44 131 651 7112.

15

16 <sup>3</sup>Centre for Reproductive Health, Edinburgh Medical School, The University of  
17 Edinburgh, Scotland, United Kingdom. E-mail: [Simon.C.Riley@ed.ac.uk](mailto:Simon.C.Riley@ed.ac.uk), Telephone:  
18 +44 131 242 6423.

19

20 <sup>4</sup>Vassar College, New York, USA. E-mail: [ebradley@vassar.edu](mailto:ebradley@vassar.edu), Telephone: +1 203  
21 499 7351.

22

23 \*Corresponding author (NBB)

24

25 ¶These authors contributed equally to this work.

26

NOTE: This preprint reports new research that has not been certified by peer review and should not be used to guide clinical practice.

## 27 **Abstract**

## 28 **Background**

29 Ethiopia has one of the highest maternal mortality ratios in Africa. Few have examined the  
30 quality of labour and delivery (L&D) care in the country. This study evaluated the quality of  
31 routine L&D care and identified patient-and hospital-level factors associated with the quality  
32 of care in a subset of government hospitals.

## 33 **Materials and methods**

34 This was a facility-based, cross-sectional study using direct non-participant observation  
35 carried out in 2016. All mothers who received routine L&D care services at government  
36 hospitals (n=20) in one of the populous regions of Ethiopia, Southern Nations Nationalities  
37 and People's Region (SNNPR), were included. Mixed effects multilevel linear regression  
38 modeling was employed in two stages using hospital as a random effect, with quality of L&D  
39 care as the outcome and selected patient and hospital characteristics as independent variables.  
40 Patient characteristics included woman's age, number of previous births, number of skilled  
41 attendants involved in care process, and presence of any danger sign in current pregnancy.  
42 Hospital characteristics included teaching hospital status, mean number of attended births in  
43 the previous year, number of fulltime skilled attendants in the L&D ward, whether the  
44 hospital had offered refresher training on L&D care in the previous 12 months, and the extent  
45 of resources available (measured on a 0-100% scale) to provide quality L&D care as defined  
46 by the Ethiopian Ministry of Health in 2014. The outcome was measured with a quality of  
47 L&D care score (scale 0 to 100) based on adherence to L&D care standards, which had been  
48 introduced by the Ethiopian Ministry of Health in 2014.

## 49 **Results**

50 On average, the hospitals met two-thirds of the standards for L&D care quality, with  
51 substantial variation between hospitals (standard deviation 10.9 percentage points). While the  
52 highest performing hospital met 91.3% of standards, the lowest performing hospital met only  
53 35.8% of the standards. Hospitals had the highest adherence to standards in the domain of  
54 immediate and essential newborn care practices (86.8%), followed by the domain of care  
55 during the second and third stages of labour (77.9%). Hospitals scored substantially lower in  
56 the domains of active management of third stage of labour (AMTSL) (42.2%), interpersonal  
57 communication (47.2%), and initial assessment of the woman in labour (59.6%). We found  
58 the quality of L&D care score was significantly higher for women who had a history of any  
59 danger sign ( $\beta = 5.66$ ;  $p$ -value = 0.001) and for women who were cared for at a teaching  
60 hospital ( $\beta = 12.10$ ;  $p$ -value = 0.005). Additionally, hospitals with lower volume and more  
61 resources available for L&D care ( $P$ -values < 0.01) had higher L&D quality scores.

## 62 **Conclusions**

63 Overall, the quality of L&D care provided to labouring mothers at government hospitals in  
64 SNNPR was limited. Lack of adherence to standards in the areas of the critical tasks of initial  
65 assessment, AMTSL, interpersonal communication during L&D, and respect for women's  
66 preferences are especially concerning. Without greater attention to the quality of L&D care,  
67 regardless of how accessible hospital L&D care becomes, maternal and neonatal mortality  
68 rates are unlikely to decrease substantially.

## 69 **Key words**

70 Quality, Process, Labour, Delivery, Hospital, SNNPR, Ethiopia

71

72

73

## 74 **Background**

75 Globally, more than 300,000 mothers die annually due to preventable pregnancy and  
76 childbirth related problems (1). Almost all (99%) of these deaths occur in low-and  
77 middle-income countries (LMICs) (2), of which more than two thirds were in sub-  
78 Saharan Africa (SSA). Ethiopia has one of the highest maternal mortality ratios  
79 (MMR) in SSA, 412 per 100,000 live births (3). While countries in SSA have  
80 experienced substantial reductions in MMR largely due to increased access to skilled  
81 birth attendance (4) in the last thirty year, MMR in SSA continues to lag far behind.  
82 Ethiopia is not on track to meet Sustainable Development Goals of reducing MMR to  
83 less than 70 per 100,000 live births and ending preventable deaths of newborns to at  
84 least as low as 12 per 1,000 live births by 2030 (5, 6).

85

86 While access to skilled birth attendance is essential , newer evidence is emerging on  
87 the importance of enhancing the quality of labour and delivery (L&D) care in order to  
88 reduce MMR. Half of all maternal deaths and one million newborn deaths can be  
89 prevented annually by providing high-quality care before, during, and after childbirth  
90 (7-11). Furthermore, qualitative data from Ethiopia (12) have suggested that  
91 perceptions of poor quality of hospital-based L&D care can be a major barrier in  
92 scaling up the use of available skilled birth attendants, limiting their impact on MMR.

93

94 Although researchers and policymakers have underscored the importance of quality of  
95 L&D care (7), few empirical studies in SSA have examined the quality of L&D  
96 services, and those that have (13-15) generally described overall quality without  
97 examining the patient- and hospital-level factors that were associated with poor  
98 quality of L&D services. The one study we found that used a substantial sample of  
Quality of Labour and Delivery Care Process in Ethiopian Hospitals

99 hospitals to examine factors associated with L&D quality was from Rwanda (12) and  
100 is also more than a decade old; this study (12) found no significant patterns in quality  
101 of L&D care by hospital-level factors. Thus, the contemporary level of quality of  
102 hospital-based L&D care as well as the patient- and hospital-level factors associated  
103 with higher L&D care quality in SSA in general and in Ethiopia, specifically, remain  
104 largely unknown.

105

106 Accordingly, we sought to describe the quality of hospital-based L&D care as  
107 measured by adherence to L&D quality of care standards set forth by the Ethiopian  
108 Ministry of Health (16) and to identify patient- and hospital-factors associated with  
109 higher quality L&D hospital care in Ethiopia. We used a non-participant observation  
110 study conducted in 20 government hospital in the most populous region of Ethiopia,  
111 Southern Nations Nationalities and People's Region (SNNPR). Findings may be useful  
112 for designing and targeting intervention to improve quality of care and hence reduce  
113 MMR.

## 114 **Materials and methods**

### 115 **Study design**

116 We undertook a non-participant observation study conducted with all normal vaginal  
117 deliveries of women 18 years and older occurring in government hospitals (n=20) in  
118 the Ethiopian region of SNNPR from November 11 to December 10, 2016. Births were  
119 excluded (n=16 births) if the birthing woman had any high-risk factors (e.g., pre-  
120 eclampsia or previous scar), if the neonate was not alive at birth, or if the birthing  
121 woman developed complications during the during the first hour following the birth.

## 122 **Data collection**

123 In each hospital, non-participant observation was undertaken by two experienced,  
124 professional midwives identified as outside assessors and previously not known to the  
125 hospital staff. The birthing process for women who were attended between 8:30am  
126 and 12:30pm and between 1:30pm and 5:30pm and between 6:30pm and 9:30pm were  
127 observed until one hour postpartum. In high volume hospitals, data collectors  
128 observed the maximum number of births possible without compromising data quality.  
129 If only one woman was in active labour, both data collectors observed. If two women  
130 who were in active labour were being attended simultaneously, the data collectors  
131 observed one each, and if more than two were occurring simultaneously, the data  
132 collectors selected two women using a lottery method and observed one each.

133

134 Using an observation checklist, data collectors assigned score of ‘1’ if the activity  
135 were observed and performed according to the recommended standard of care and ‘0’  
136 otherwise. At the end of a completed observation and before starting a new one, data  
137 collectors reviewed the clinical record of the woman to gather data about her initial  
138 assessments based on the history and physical examination completed before the  
139 admission observation began.

## 140 **Measures**

### 141 **Dependent variable**

142 The outcome was calculated for each birth as the percentage of all relevant standards  
143 fulfilled, with possible values from 0%-100%. The percentage fulfilled was reported  
144 for the relevant standards overall as well as within 7 domains. For each hospital, the

145 quality of L&D care score was determined as the mean percentage across all observed  
146 births in that hospital, reported for the standards overall and within each of 7 domains.

147

## 148 **Independent variables**

149 Patient-level independent variables included the woman's age, number of previous  
150 births, number of skilled attendants involved in care process, presence of any danger  
151 sign in current pregnancy. Hospital-level independent variables included teaching  
152 hospital status, mean number of births in the hospital in the previous year, number of  
153 fulltime skilled attendants in the L&D ward on the assessment day, whether the  
154 hospital had offered refresher training on L&D care in the previous 12 months, and  
155 the extent of resources available (measured on a 0-100% scale) to provide quality  
156 L&D care as defined by the Ethiopian Ministry of Health (16). Details on the measure  
157 of resources available have been previously described (17).

158

## 159 **Data analysis**

160 We used descriptive statistics to summarize both the outcome (overall and for 7  
161 domains) and the patient- and hospitals-level independent variables. We examined the  
162 unadjusted associations between the outcome and each independent variable using t-  
163 tests for binary and categorical independent variables and Pearson correlation  
164 coefficients for continuous independent variables. Results available from first author.

165

166 Multivariable regression was employed to estimate adjusted associations between  
167 hospital quality of L&D care scores and the independent variables. Mixed effects  
168 multilevel linear regression was fitted in two stages to achieve a parsimonious

169 predictive model. The first stage, or null model, was fitted with no explanatory  
170 variables using hospital as a random effect. This model was used to determine how  
171 being attended in a particular hospital may explain differences in the outcome. The  
172 second stage, or the full model, included the patient-and hospital-level independent  
173 variables.

174 Intra-class correlation coefficients (ICCs) were also calculated for both the null and  
175 full models to explore the amount of variance in the outcome attributable to  
176 differences within versus between hospitals. Because of the centering of all  
177 continuous independent variables on the grand means, the random term of the  
178 intercept at hospital level adjusted for the variance in outcome attributable to the  
179 hospital, and appropriately controlled for the clustering of observations by hospital.  
180 Interaction terms were created, and their effects tested. Cases with missing data for  
181 key variables were excluded from further analysis. P-value <0.05 was used to  
182 determine statistical significance of the associations. Data analysis was accomplished  
183 using the Advanced Statistics Module of SPSS IBM Statistics.

184 Ethics approval was obtained from the Institutional Review Boards (IRBs) of Jimma  
185 University (Ethiopia) and The University of Edinburgh (UK). All participants  
186 provided informed consent following the procedure approved by the IRBs before  
187 being observed. The authors did not have access to information that could identify  
188 individual participants during or after data collection.



## 189 Results

### 190 Characteristics of the study participants and hospitals

191 A total of 1,351 labouring mothers were approached and gave consent to participate in  
192 the study; 16 were later excluded due to non-normal progression of labour resulting in  
193 an analytic sample of 1,335 women (98.8% of those approached for the study).

194

195 The mean age of women in the study was 25.7 years (standard deviation (SD) = 4.8  
196 years), and about two thirds were aged 21-30 years (**Table 1**). Nearly three quarters  
197 (74.2%) had previously given birth to one or two children. More than three quarters  
198 (77.1%) of the women had had 3 or 4 antenatal care (ANC) visits for the present  
199 pregnancy. Of the 1,335 women in the analytic sample, 38 women (2.8%)  
200 encountered one or more danger signs in the present pregnancy. Just more than half  
201 (57.8%) of the women were attended at a non-teaching type of hospital. The baby was  
202 alive and in good condition (with no complication) until the end of observation in  
203 95.6% (n = 1,275) of the cases, while the rest (n = 58) were alive with complication  
204 (**Table 1**).

205 **Table 1: Characteristics of women observed (N=1,335) for quality of L&D care at**  
206 **public hospitals in SNNPR, Ethiopia, 2016**

| Characteristics | n   | %    |
|-----------------|-----|------|
| Age of women    |     |      |
| 20 and below    | 244 | 18.4 |
| 21-25           | 487 | 36.7 |
| 26-30           | 441 | 33.3 |
| 31-35           | 119 | 9.0  |
| 36-40           | 40  | 3.0  |
| 41 and above    | 4   | 0.3  |
| Missing         | 9   | 0.7  |

|                                                  |      |      |
|--------------------------------------------------|------|------|
| Number of previous pregnancies                   |      |      |
| 1-2                                              | 754  | 66.8 |
| 3-4                                              | 269  | 23.8 |
| 5 and above                                      | 106  | 9.4  |
| Missing                                          | 206  | 15.4 |
| Number of previous births                        |      |      |
| 0                                                | 87   | 6.5  |
| 1-2                                              | 808  | 74.2 |
| 3-4                                              | 201  | 18.5 |
| 5 and above                                      | 80   | 7.3  |
| Missing                                          | 159  | 11.9 |
| Number of ANC visits in current pregnancy        |      |      |
| 1-2                                              | 246  | 20.4 |
| 3-4                                              | 929  | 77.1 |
| 5 and above                                      | 30   | 2.5  |
| Missing                                          | 130  | 9.7  |
| Encountered any danger sign in current pregnancy |      |      |
| Yes                                              | 38   | 2.8  |
| No                                               | 1297 | 97.8 |
| Position of the woman during childbirth          |      |      |
| Supine (lithotomy)                               | 1319 | 98.8 |
| Lateral tilt                                     | 16   | 1.2  |
| Foetal outcome at the end of observation         |      |      |
| Alive with no complication                       | 1275 | 95.6 |
| Alive with complication                          | 58   | 4.4  |
| Missing                                          | 2    | 0.5  |

207

208 A total of 35% of the hospitals were teaching hospitals (**Table 1A**). On average,  
 209 hospitals had 49,077 births in the previous year, with a mean service volume of 2454  
 210 deliveries (SD 1293.3) in a hospital. Hospitals had on average 440 fulltime skilled  
 211 attendants in the L&D ward, with an average of 22 (SD 9.7) per hospital. A total of  
 212 45% of the hospitals had offered refresher training on management of L&D in the past  
 213 12 months. The average score (17) assessing the extent of resources available to  
 214 provide quality of L&D care was 68.2%, with a SD of 15.9 percentage points.

215 **Table 1A: Characteristics of hospitals (N=20)**

| Characteristics                                            | N (or mean percentage score) | % (or SD) |
|------------------------------------------------------------|------------------------------|-----------|
| Teaching status                                            |                              |           |
| Teaching                                                   | 7                            | 35        |
| Non-teaching                                               | 13                           | 65        |
| Number of fulltime skilled attendants in labour ward       | 22.0                         | 9.7       |
| Refresher training on L&D care given in previous 12 months |                              |           |
| Yes                                                        | 9                            | 45        |
| No                                                         | 11                           | 55        |
| Number of births attended in last year                     | 2454.0                       | 1293.3    |
| Measure of resources available (0-100% scale)              | 68.2                         | 15.9      |

216

## 217 **Outcome**

### 218 **Summary score for quality of L&D care**

219 The mean percentage of standards fulfilled across all hospitals was 66.6% (standard  
220 deviation [SD] 10.9 percentage points) (**Fig 1**). The highest performing hospitals met  
221 91.3% of standards; the lowest performing hospital met 35.8% of the standards.  
222 Hospitals achieved the highest mean percentage score in the domain of immediate and  
223 essential newborn care practices (86.8%, SD 11.8 percentage points), followed by the  
224 domain of second and third stages of labour 77.9% (SD 20.6 percentage points). The  
225 domain with the lowest mean percentage score was in complying with AMTSL  
226 standards (42.2%, SD 12.2 percentage points), followed by the domains of  
227 interpersonal communication (47.2%, SD 38.4 percentage points) and initial  
228 assessment of the woman in labour (59.6%, SD 15.6 percentage points).

229

230 **Fig 1: Summary of quality of L&D care, overall and by domain, at public**  
231 **hospitals in SNNPR, Ethiopia, 2016**

232

233 **Domain 1: Initial assessment**

234 Overall, providers adhered to an average of 59.6% of the required initial assessment  
235 standards, SD 15.6 percentage points. The mean percentage scores varied  
236 substantially across hospitals with the highest fulfilling 74.8% of the standards (SD  
237 12.7) and the lowest fulfilling 30.6% of the standards (SD 15.1). The most commonly  
238 documented aspects of the initial assessment were vaginal examination findings,  
239 (95.3%), which included checking and recording cervical dilatation, foetal  
240 presentation, and membrane status and pulse rate (93.8%). In contrast, documentation  
241 of findings from the general examination was generally less common (58.4%). The  
242 woman's temperature was recorded for about half (52.5%) of the women. The  
243 previous obstetric history of complication during previous pregnancies was recorded  
244 for 6% of the women. Similarly, providers recorded whether the woman had any  
245 danger sign in the present pregnancy in only 2.8% of the cases.

246 **Domain 2: Second and third stages of labour**

247 In this domain, providers adhered to an average 77.9% of the recommended  
248 standards, SD 20.6 percentage points. The mean percentage scores were as high as  
249 99.1% (SD 4.1 percentage points) in one hospital and as low as percentage  
250 points 54.0% (SD 21.2 percentage points) for another hospital. Scores were highest  
251 (92.1%–95.1%) for several tasks including examination of the placenta and  
252 membranes for completeness, palpation of the uterus every 15 minutes after the  
253 placenta is delivered to confirm uterine contraction, and examination of the vulval-  
254 perineal region for possible lacerations. In contrast, scores were far lower for other  
255 tasks. For example, checking for vaginal bleeding and taking blood pressure and pulse  
256 rate every 15 minutes after birth were performed in just about half (52.8%) and less

257 than one third (30.5%) of the cases, respectively (for more information on this  
258 domain, see **Table 2**).

259 **Table 2: Standards fulfilled in the second and third stages of labour, and**  
260 **immediate and essential newborn care in the first hour postpartum at public**  
261 **hospitals in SNNPR, Ethiopia, 2016**

| Domain of care process                                                                             | Observed deliveries (N=1335) |      |
|----------------------------------------------------------------------------------------------------|------------------------------|------|
|                                                                                                    | n                            | %    |
| <b>Care during the second and third stages of labour (mean percentage score = 72.9% [SD 20.6])</b> |                              |      |
| Examined completeness of placenta and membranes                                                    | 1221                         | 92.1 |
| Palpated uterus after placenta is delivered to confirm uterine contraction                         | 1063                         | 79.6 |
| Examined vulval-perineal region for possible lacerations                                           | 1229                         | 93.0 |
| Checked vaginal bleeding every 15 minutes after placenta is delivered                              | 686                          | 52.8 |
| Checked mother's vital sign (pulse rate & BP) every 15 minutes                                     | 406                          | 30.5 |
| <b>Immediate and essential newborn care practice (mean percentage score = 86.8% [SD 11.8])</b>     |                              |      |
| Delivered to mother's abdomen                                                                      | 1170                         | 87.6 |
| Immediately dried with warm towel                                                                  | 1289                         | 96.6 |
| Wiped eyes as s/he stimulated breathing                                                            | 1255                         | 94.0 |
| Cut cord, tied 2 fingers from abdomen & another 2 fingers from the first                           | 1195                         | 89.5 |
| Placed skin to skin on mother's chest or abdomen for at least 30 minutes to initiate breastfeeding | 498                          | 37.6 |
| Applied tetracycline eye ointment to both eyes                                                     | 1163                         | 87.6 |
| Gave vitamin K 1mg IM                                                                              | 1214                         | 91.3 |
| Weighed and classified                                                                             | 1312                         | 98.7 |

262

263 **Domain 3: Immediate and essential newborn care**

264 Overall, providers complied to an average 86.8% of the standards for immediate and  
265 essential newborn care practices, SD 11.8 percentage points (**Table 2**). Providers  
266 performed the recommended tasks in 87.6% to 98.7% of the deliveries, and the

267 performance was less variable across hospitals relative to other domains with most  
268 hospitals having a mean percentage score above 80%. The vast majority (98.7%) of  
269 newborns were weighed and classified and 96.6% were dried with a towel  
270 immediately after birth; however, immediate post-partum care was often lacking. For  
271 instance, providers helped the mother initiate breastfeeding within the first hour post-  
272 partum in 37.6% of the cases, checked the newborn's temperature every 15 minutes in  
273 only 21.9% of the cases, and explained the importance of delayed bathing for the first  
274 24 hours after birth to just more than half (52.3%) of the women.

#### 275 **Domain 4: Infection prevention (IP) practice**

276 Providers adhered to an average 71.8% of the recommended IP standards, SD 16.6  
277 percentage points. The scores varied across hospitals, ranging between 90.5% (SD 7.9  
278 percentage points) to 41.3% (SD 11.8 percentage points). Providers correctly wore  
279 gloves, disposed sharps and decontaminated instruments and surfaces after procedure  
280 most of the time (96.7%, 91.8% and 96.5%, respectively); however, providers rarely  
281 wore other protective clothing other than gloves (14.4%), and hand hygiene before  
282 examination during labour occurred in only 38.8% of the cases (for more information  
283 from this domain, see **Table 3**).

284 **Table 3: IP practices during routine L&D care and partograph use at public**  
285 **hospitals in SNNPR, Ethiopia, 2016**

| Domain of care process                                        | Observed deliveries (N=1335) |      |
|---------------------------------------------------------------|------------------------------|------|
|                                                               | n                            | %    |
| <b>IP practices (mean percentage score = 71.8% [SD 16.6])</b> |                              |      |
| Washed hands before examination during labour                 | 503                          | 38.8 |
| Put on two pairs of sterile gloves for vaginal examination    | 1291                         | 96.7 |
| Put on clothing to protect face and other parts of the body   | 192                          | 14.4 |

|                                                                                                               |      |      |
|---------------------------------------------------------------------------------------------------------------|------|------|
| Decontaminated all reusable instruments in 0.5% chlorine solution                                             | 1226 | 91.8 |
| Disposed all sharps in a yellow-colored puncture proof container immediately after use                        | 1284 | 96.5 |
| Disposed all contaminated wastes in a red-colored leak proof container <sup>1</sup>                           | 1038 | 77.9 |
| Disposed non contaminated materials in a container designated for general waste                               | 1063 | 79.7 |
| Washed hands thoroughly with soap and water, and dried them                                                   | 1015 | 76.4 |
| <b>Partograph use (mean percentage score = 76.3% [SD 23.9])</b>                                               |      |      |
| Progress of the labour monitored using partograph                                                             | 1073 | 80.4 |
| While the woman was in active labor, plotted the following physical exam measurements on partograph (n=1073): |      |      |
| FHB at least every half hour                                                                                  | 918  | 85.6 |
| Cervical dilatation at least every 4 hours                                                                    | 975  | 91.2 |
| Descent of head at least every 4 hours                                                                        | 841  | 78.7 |
| Frequency & duration of contractions at least every half hour                                                 | 902  | 84.4 |
| Blood pressure at least every 4 hours                                                                         | 866  | 81.1 |
| Temperature at least every 2 hours                                                                            | 390  | 36.6 |

286 <sup>1</sup>*Contaminated wastes included for example gloves and swabs.*

## 287 **Domain 5: Use of partograph to monitor labour**

288 The overall mean percentage score for correct use of partograph was 76.4%, SD 23.9  
 289 percentage points. Hospitals varied substantially in this area of practice with providers  
 290 at one hospital correctly used partograph all the time (100%), while those at another  
 291 doing so in about half (52.1%, SD 19.4 percentage points) of the cases. In cases for  
 292 which providers used a partograph to monitor the progress of labour (n=1073), they  
 293 plotted cervical dilatation on the partograph at least every 4 hours in 91.2% of the  
 294 cases, but providers recorded temperature at least every 2 hours in only 36.6% of the  
 295 cases (for more information from this domain, see **Table 3**).

## 296 **Domain 6: Active management of third stage of labour (AMTSL)**

297 Providers met an average 42.4% of the AMTSL standards, SD 12.2 percentage points.  
298 Three hospitals performed the highest in this area, scoring 50.5% in this domain (SD  
299 0 – 0.2 percentage points), while the lowest performing hospital scored 24.5% (SD  
300 10.9 percentage points). Although 97.2% of the women received a uterotonic, i.e.,  
301 oxytocin or ergometrine, and almost all of them received it within three minutes of  
302 delivery, and 90.8% within one minute of delivery, controlled cord traction was  
303 performed in only 74.1% of cases, and uterine massage was performed in only 42.4%  
304 of the observed deliveries.

### 305 **Domain 7: Interpersonal communication during L&D**

306 Providers adhered to an average 47.2% of the recommended practices of interpersonal  
307 communication during L&D, SD 38.4 percentage points. Three hospitals scored  
308 above 82% (SD ranging between 10.7 and 32.8 percentage points), while another  
309 three scored below 15% (SD 13.2 – 34.2 percentage points). Providers gave  
310 explanations of procedures and what would happen during labour in about two thirds  
311 (63.1%) of the labours observed, but providers encouraged only about a third (31.4%)  
312 of the women to have a support person present throughout L&D.

### 313 **Factors associated with quality of L&D care process**

314 In the fully adjusted model with hospital as a random effect (ICC in null model 0.59),  
315 both patient and hospital characteristics were significantly associated with quality of  
316 L&D care (**Table 4**). Among the patient characteristics examined, the presence of a  
317 danger sign in the current pregnancy was significantly (and positively) associated  
318 with quality of L&D care ( $\beta = 5.66$ ; P-value = 0.001). None of the other patient  
319 characteristics examined—age of the woman, number of previous births, or the  
320 number of skilled attendants involved in care processes—was significantly associated



321 with quality of L&D care. Among hospital characteristics examined, type of hospital  
322 (teaching versus non-teaching), lower hospital volume of births in the previous year,  
323 and having more resources available for L&D care were each associated with higher  
324 quality of L&D care (P-values < 0.01). Neither the number of fulltime skilled health  
325 professionals working in the maternity ward nor provision of refresher training on  
326 management of L&D in the past 12 months were significantly associated with quality  
327 of L&D care (P-values > 0.05).

328

329

330

331

332

333

334

335

336

337

338

339 **Table 4: Predictors of the index of quality of L&D care provision at public hospitals in SNNPR, Ethiopia, 2016**

| Characteristics                                                                                  | Null model                             |       |         | Full model |      |              |
|--------------------------------------------------------------------------------------------------|----------------------------------------|-------|---------|------------|------|--------------|
|                                                                                                  | $\beta$                                | SE    | P-value | $\beta$    | SE   | P-value      |
| <b>Fixed Part: Level-1</b>                                                                       |                                        |       |         |            |      |              |
| Age                                                                                              |                                        |       |         | 0.30       | 0.33 | 0.371        |
| N <sub>o</sub> of previous births                                                                |                                        |       |         | -0.14      | 0.33 | 0.664        |
| N <sub>o</sub> of skilled attendants involved in care process                                    |                                        |       |         | 0.04       | 0.46 | 0.930        |
| Danger sign in current pregnancy (Reference: no)                                                 |                                        |       |         | 5.66       | 1.42 | <b>0.000</b> |
| <b>Fixed Part: Level-2</b>                                                                       |                                        |       |         |            |      |              |
| Hospital-type:                                                                                   |                                        |       |         |            |      |              |
| Teaching (Reference: non-teaching)                                                               |                                        |       |         | 12.10      | 3.82 | <b>0.005</b> |
| Mean N <sub>o</sub> of births attended in previous year                                          |                                        |       |         | -5.34      | 1.77 | <b>0.007</b> |
| Mean N <sub>o</sub> of fulltime skilled attendants in L&D ward                                   |                                        |       |         | -0.75      | 1.87 | 0.694        |
| Refresher training on management of L&D                                                          |                                        |       |         | -1.58      | 1.32 | 0.243        |
| Index of structural quality of L&D care                                                          |                                        |       |         | 5.26       | 1.30 | <b>0.001</b> |
| <b>Random Part (random effects as level-2 variance)</b>                                          |                                        |       |         |            |      |              |
| Fixed effects intercept                                                                          | 67.41                                  | 1.87  | 0.000   | 50.89      | 4.89 | 0.000        |
| Random effects intercept (hospital level variance)                                               | 68.04                                  | 21.95 | 0.002   | 23.11      | 8.01 | 0.004        |
| Residual (variance at individual level)                                                          | 47.90                                  | 2.44  | 0.000   | 46.88      | 2.39 | 0.000        |
| <b>ICCs</b>                                                                                      |                                        |       |         |            |      |              |
| Level-2                                                                                          | $68.04/(68.04+47.90) = 0.587 = 58.7\%$ |       |         |            |      |              |
| Level-1                                                                                          | $23.1/(23.1+46.9) = 0.33 = 33\%$       |       |         |            |      |              |
| <b>Log-likelihood ratio test for preference to multilevel model with hospital random effects</b> |                                        |       |         |            |      |              |
| -2*Log-likelihood at Level-2                                                                     | 5361.96                                |       |         |            |      |              |
| -2*Log-likelihood at Level-1                                                                     | 5324.75                                |       |         |            |      |              |
| P-value                                                                                          | <0.001                                 |       |         |            |      |              |

## 341 **Discussion**

342 We found that on average hospitals met only two-thirds of the standards for quality of  
343 L&D care, with particularly poor performance in three domains of care: initial  
344 assessment of the woman in labour, AMTSL, and interpersonal communication.  
345 Importantly, although quality of care was limited overall, one hospital achieved more  
346 than 90% of standards met, providing an example of “positive deviance” (18) that  
347 could yield information and inspiration for future quality improvement efforts among  
348 hospitals in SNNPR. The study also revealed that both patient and hospital  
349 characteristics were associated with the quality of L&D care.

350 The finding on the initial assessment tasks, completed in about 60% of the cases, was  
351 lower than previously reported in studies from other regions of Ethiopia (19, 20). For  
352 instance, Getachew and colleagues in a USAID-funded study (19) with far less direct  
353 observation of births reported that providers performed these tasks in 80–100% of the  
354 cases; and Yigzaw and colleagues in a study of Amhara region hospitals reported that  
355 providers performed these tasks in 73.6% of the cases (20). The differences are likely  
356 due to differences in methodology and region sampled; regardless, the present study  
357 highlights the prevalence of missed opportunities for timely identification of women in  
358 need of further care or referral. The high-performance levels on examination of the  
359 placenta, membranes and vulval-perineal region, and uterine massage yet low  
360 performance on monitoring the condition of a mother with vaginal bleeding are  
361 findings that are consistent with other studies conducted in SSA (20). Lack of  
362 monitoring of vaginal bleeding signifies the potential risk of developing immediate  
363 post-partum complications endangering the mother’s life.

364 Several studies have similarly reported low performance on putting newborn skin-to-  
365 skin with the mother (19, 21, 22). Low score for advising about delaying baby bath is  
366 also consistent with a similar study (13). Thus, enhancing compliance to the related  
367 standards is imperative. The low hand washing practice observed in this study is higher  
368 than a study conducted in Ethiopia six years ago (19) and comparable with another  
369 study conducted in Malawi (23); it is also consistent with several studies conducted in  
370 low-income settings (19, 24, 25), and appears to be an important gap as it risks  
371 maternal sepsis and cross infections with fatal diseases like HIV and hepatitis B (19).

372 Consistent use of partograph for labour monitoring is much better than for previous  
373 studies conducted in different countries including, Uganda (26), and Ethiopia (19), and  
374 almost comparable with a study conducted in Kenya (27). When correctly used to  
375 monitor progress of labour, a partograph can help improve fetal and newborn survival,  
376 and significantly reduces unnecessary interventions (19, 28). It is important to explore  
377 the reasons for non-use and incorrect use of this effective intervention. The finding on  
378 compliance to all AMTSL tasks is also much higher than the study conducted in  
379 Ethiopia which reported 29% (19). This may partly be explained by larger sample size  
380 used in the present study as well as the time gap between the studies (2010 versus  
381 2016); the current finding may reflect the result of the Government's efforts towards  
382 safe motherhood such as massive human resource and health facility development  
383 strategies.

384 The inadequate performance on interpersonal communication and respecting women's  
385 preferences is consistent with previous studies (19, 22, 29). Although some have  
386 argued (30) that such communication may be unrecognized and thus underestimated by  
387 data collectors, our findings nonetheless highlight potential opportunities for

388 improvement as poor interpersonal communication and lack of responsiveness to  
389 preferences can limit maternal health services utilization (31).

390 The negative correlation between service volume and quality of care is consistent with  
391 previous studies conducted in low-income settings (22, 32). Low volume hospitals may  
392 tend to pay more attention to quality of care than hospitals that are overwhelmed with  
393 patient volume. Additionally, observing higher quality of L&D care at teaching versus  
394 non-teaching hospitals highlights the important role of senior attending professionals,  
395 and is consistent with the premise that high quality providers are critical to produce  
396 high quality outcomes (33).

397 The findings should be interpreted in light of several limitations. First, composite  
398 scores reflect averages that can mask meaningful variation in individual item responses  
399 (34), although they can be more reliable than individual items (35, 36). We have  
400 provided ranges and standard deviations to augment the composite score summary  
401 statistics. Summary scores can also facilitate comparison and simplify communication  
402 of performance on technical components of care to non-technical audiences (35).  
403 Second, direct observation can influence measures of performance due to the  
404 inevitable Hawthorne effect (34, 37); however, we sought to minimize this bias by  
405 observing hospital staff for a full month and assured anonymity in all data reports.  
406 Third, the sample was restricted to hospitals from SNNPR; results may differ in other  
407 geographies. Finally, we were unable to collect information on education and income  
408 of the women, factors which may influence quality of L&D care. Future studies are  
409 warranted to further explore the role of socioeconomic factors in quality of L&D care  
410 received.

## 411 **Conclusions**

412 In sum, the study indicates substantial opportunities for improvement in the quality of  
413 routine L&D care provided both to the women and their babies at Government  
414 hospitals in Ethiopia. In particular, screening and monitoring of maternal and newborn  
415 conditions were inadequate. Also, early initiation of breastfeeding by placing skin-to-  
416 skin with mother, prevention of hypothermia, and advice on delayed baby bath for the  
417 first 24 hours were implemented less often than recommended, and critical tasks  
418 including hand washing, use of a partograph, AMTSL, and interpersonal  
419 communication during L&D were limited. Quality of L&D care was most concerning  
420 in high volume, non-teaching hospitals.

421

422 At the same time, our study identified hospitals that demonstrated positive deviance  
423 (18) in the sense that they performed at high levels despite the challenges all hospitals  
424 faced. For instance, in one hospital, the percentage of standards adhered to exceeded  
425 90%. Future studies may examine such institutions more deeply to understand how to  
426 achieve and sustain high quality of L&D care, and more importantly, how to spread  
427 such practices to other hospitals in need of improvement.

## 428 **List of abbreviations**

|       |                                            |
|-------|--------------------------------------------|
| AMTSL | Active management of third stage of labour |
| FHB   | Fetal heart beat                           |
| ICCs  | Intra-class Correlation Coefficients       |
| IP    | Infection prevention                       |
| L&D   | Labour and delivery                        |

|       |                                                    |
|-------|----------------------------------------------------|
| LMICs | Low-and middle-income countries                    |
| MMR   | Maternal mortality ratio                           |
| SNNPR | Southern Nations Nationalities and People's Region |
| SSA   | Sub-Saharan Africa                                 |

## 429 **Acknowledgements**

430 We would like to thank SNNPR Regional Health Bureau and administrators of the  
431 hospitals for facilitating the data collection process. We are also grateful to the study  
432 participants and field research team for their contribution to collecting the data, and  
433 Jimma University for offering office space and facilities to ensure data security.

## 434 **References**

- 435 1. **WHO, UNICEF, UNFPA, World Bank Group, United Nations Population Division.**  
436 *Trends in maternal mortality: 1990-2015.* Geneva: World Health Organization, 2015.
- 437 2. **Say, L., et al.** *Global causes of maternal death: a WHO systematic analysis.* The Lancet  
438 Global Health, 2014, Vol. 2. pp.e323-e333.
- 439 3. **CSA Ethiopia and ORC Macro.** *Ethiopia Demographic and Health Survey 2016.* Addis  
440 Ababa : Central Statistical Authority, 2016.
- 441 4. **Campbell, O.M., et al.** *Strategies for reducing maternal mortality: getting on with what*  
442 *works.* The lancet, 2006, Vol. 368. pp.1284-1299.
- 443 5. **WHO.** *Quality, equity, dignity: the network to improve quality of care for maternal,*  
444 *newborn and child health – strategic objectives.* Geneva: World Health Organization,  
445 2018.
- 446 6. **Alkema, L., et al.** *Global, regional, and national levels and trends in maternal mortality*  
447 *between 1990 and 2015, with scenario-based projections to 2030: a systematic analysis by*

- 448 *the UN Maternal Mortality Estimation Inter-Agency Group*. The Lancet, 2016, Vol. 387.  
449 pp.462-474.
- 450 7. **Kruk, M.E., et al.** *High-quality health systems in the Sustainable Development Goals era:*  
451 *time for a revolution*. The Lancet Global Health, 2018, Vol. 6. pp.e1196-e1252.
- 452 8. **Chou, D., et al.** *Ending preventable maternal and newborn mortality and stillbirths*. BMJ,  
453 2015, Vol. 351. p.h4255.
- 454 9. **Tunçalp, Ö., et al.** *Quality of care for pregnant women and newborns—the WHO vision*.  
455 BJOG: an international journal of obstetrics & gynaecology, 2015, Vol. 122. pp.1045-  
456 1049.
- 457 10. **Sharma, G., et al.** *Quality care during labour and birth: a multi-country analysis of*  
458 *health system bottlenecks and potential solutions*. BMC pregnancy and childbirth, 2015,  
459 Vol. 15. p.S2.
- 460 11. **Lawn, J.E., et al.** *Stillbirths: Where? When? Why? How to make the data count?* The  
461 Lancet, 2011, Vol. 377 . pp.1448-1463.
- 462 12. **Sipsma, H., et al.** *Preferences for home delivery in Ethiopia: provider perspectives*.  
463 Global public health, 2013, Vol. 8. pp.1014-1026.
- 464 13. **Nesbitt, R.C., et al.** *Quality along the continuum: a health facility assessment of*  
465 *intrapartum and postnatal care in Ghana*. PloS one, 2013, Vol. 8. p.e81089.
- 466 14. **Bradley, E.H., et al.** *Access and quality of rural healthcare: Ethiopian Millennium Rural*  
467 *Initiative*. International Journal for Quality in Health Care, 2011, Vol. 23. pp.222-230.
- 468 15. **Girma, M., et al.** *Lifesaving emergency obstetric services are inadequate in south-west*  
469 *Ethiopia: a formidable challenge to reducing maternal mortality in Ethiopia*. BMC health  
470 services research, 2013, Vol. 13. p.459.
- 471 16. **FMoH of Ethiopia.** *Ethiopian Hospital Alliance for Quality (EHAQ): Labor & Delivery*  
472 *Change Package for Ethiopian Hospitals*. Addis Ababa : FMoH of Ethiopia, 2014.
- 473 17. **Bayou et al.** Structural quality of labor and delivery care in government hospitals of  
474 Ethiopia: a descriptive analysis. *BMC Pregnancy and Childbirth (2022) 22:523*.  
475 <https://doi.org/10.1186/s12884-022-04850-5>.



- 476 18. **Bradley EH**, Curry LA, Ramanadhan S, Rowe L, Nembhard IM, Krumholz HM. Research  
477 in action: Using positive deviance to improve quality of health care. Implementation  
478 Science 2009; 4:25.
- 479 19. **Getachew, A., et al.** *Quality of care for prevention and management of common maternal*  
480 *and newborn complications: a study of Ethiopia's hospitals*. Baltimore: JHPIEGO, 2011.
- 481 20. **Yigzaw T., et al.** *Quality of Midwife-provided Intrapartum Care in Amhara Regional*  
482 *State, Ethiopia*. BMC Pregnancy and Childbirth, 2017, Vol. 17. DOI 10.1186/s12884-017-  
483 1441-2.
- 484 21. **Sobel, H.L., et al.** *Immediate newborn care practices delay thermoregulation and*  
485 *breastfeeding initiation*. Acta Paediatrica, 2011, Vol. 100. pp.1127-1133.
- 486 22. **Miller, S., et al.** *Quality of care in institutionalized deliveries: the paradox of the*  
487 *Dominican Republic*. International Journal of Gynecology & Obstetrics, 2003, Vol. 82 .  
488 pp.89-103.
- 489 23. **Smith, H., et al.** *Implementing the WHO integrated tool to assess quality of care for*  
490 *mothers, newborns and children: results and lessons learnt from five districts in Malawi*.  
491 BMC pregnancy and childbirth, 2017, Vol. 17. p.271.
- 492 24. **de Graft-Johnson, J., et al.** *Cross-sectional observational assessment of quality of*  
493 *newborn care immediately after birth in health facilities across six sub-Saharan African*  
494 *countries*. BMJ open, 2017, Vol. 7. p.e014680.
- 495 25. **Hoque, D.M., et al.** *An assessment of the quality of care for children in eighteen randomly*  
496 *selected district and sub-district hospitals in Bangladesh*. BMC pediatrics, 2012, Vol. 12.  
497 p.197.
- 498 26. **Ogwang, S., et al.** *Assessment of partogram use during labour in rujumbura health Sub*  
499 *district, Rukungiri district, Uganda*. African Health Sciences, 2009, Vol. 9.
- 500 27. **Kagama, F., et al.** *Quality of care for prevention and management of common maternal*  
501 *and newborn complications: findings from a National Health Facility Survey in Kenya—*  
502 *are services provided according to international standards*. Baltimore: JHPIEGO, 2011.

- 503 28. **Luwei P, et al.** *Opportunities for Africa's Newborns: Practical data, policy and*  
504 *programmatic support for newborn care in Africa.* Geneva: World Health Organization,  
505 2014.
- 506 29. **Worku A.G., et al.** *Availability and components of maternity services according to*  
507 *providers and users' perspectives in North Gondar, northwest Ethiopia.* Reproductive  
508 Health, 2013, Vol. 10.
- 509 30. **JHPIEGO.** *Monitoring birth preparedness and complication readiness: tools and*  
510 *indicators for maternal and newborn health.* Baltimore : JHPIEGO, 2004.
- 511 31. **Bowser, D. and Hill, K.** *Exploring evidence for disrespect and abuse in facility-based*  
512 *childbirth.* Boston: USAID-TRAction Project, Harvard School of Public Health, 2010.
- 513 32. **Leisher, S.H., et al.** *Quality measurement in family planning: Past present future. Papers*  
514 *from the Bellagio Meeting on Family Planning Quality.* Oakland, CA: Metrics for  
515 Management, 2016.
- 516 33. **Mosadeghrad, A.M.** *Factors influencing healthcare service quality.* International journal  
517 of health policy and management, 2014, Vol. 3. p.77.
- 518 34. **Abramson, J. and Abramson, Z.H.** *Research methods in community medicine: surveys,*  
519 *epidemiological research, programme evaluation, clinical trials.* John Wiley & Sons,  
520 2011.
- 521 35. **The Physician Consortium for Performance Improvement.** *Measures Development,*  
522 *Methodology, and Oversight Advisory Committee: Recommendations to PCPI Work*  
523 *Groups on Composite Measures.* USA: American Medical Association, 2010.
- 524 36. **Donabedian, A.** *Evaluating the quality of medical care.* The Milbank Quarterly, 2005,  
525 Vol. 83. pp.691-729.
- 526 37. **Bowling, A.** *Research methods in health: investigating health and health services.* UK :  
527 McGraw-Hill Education, 2014.

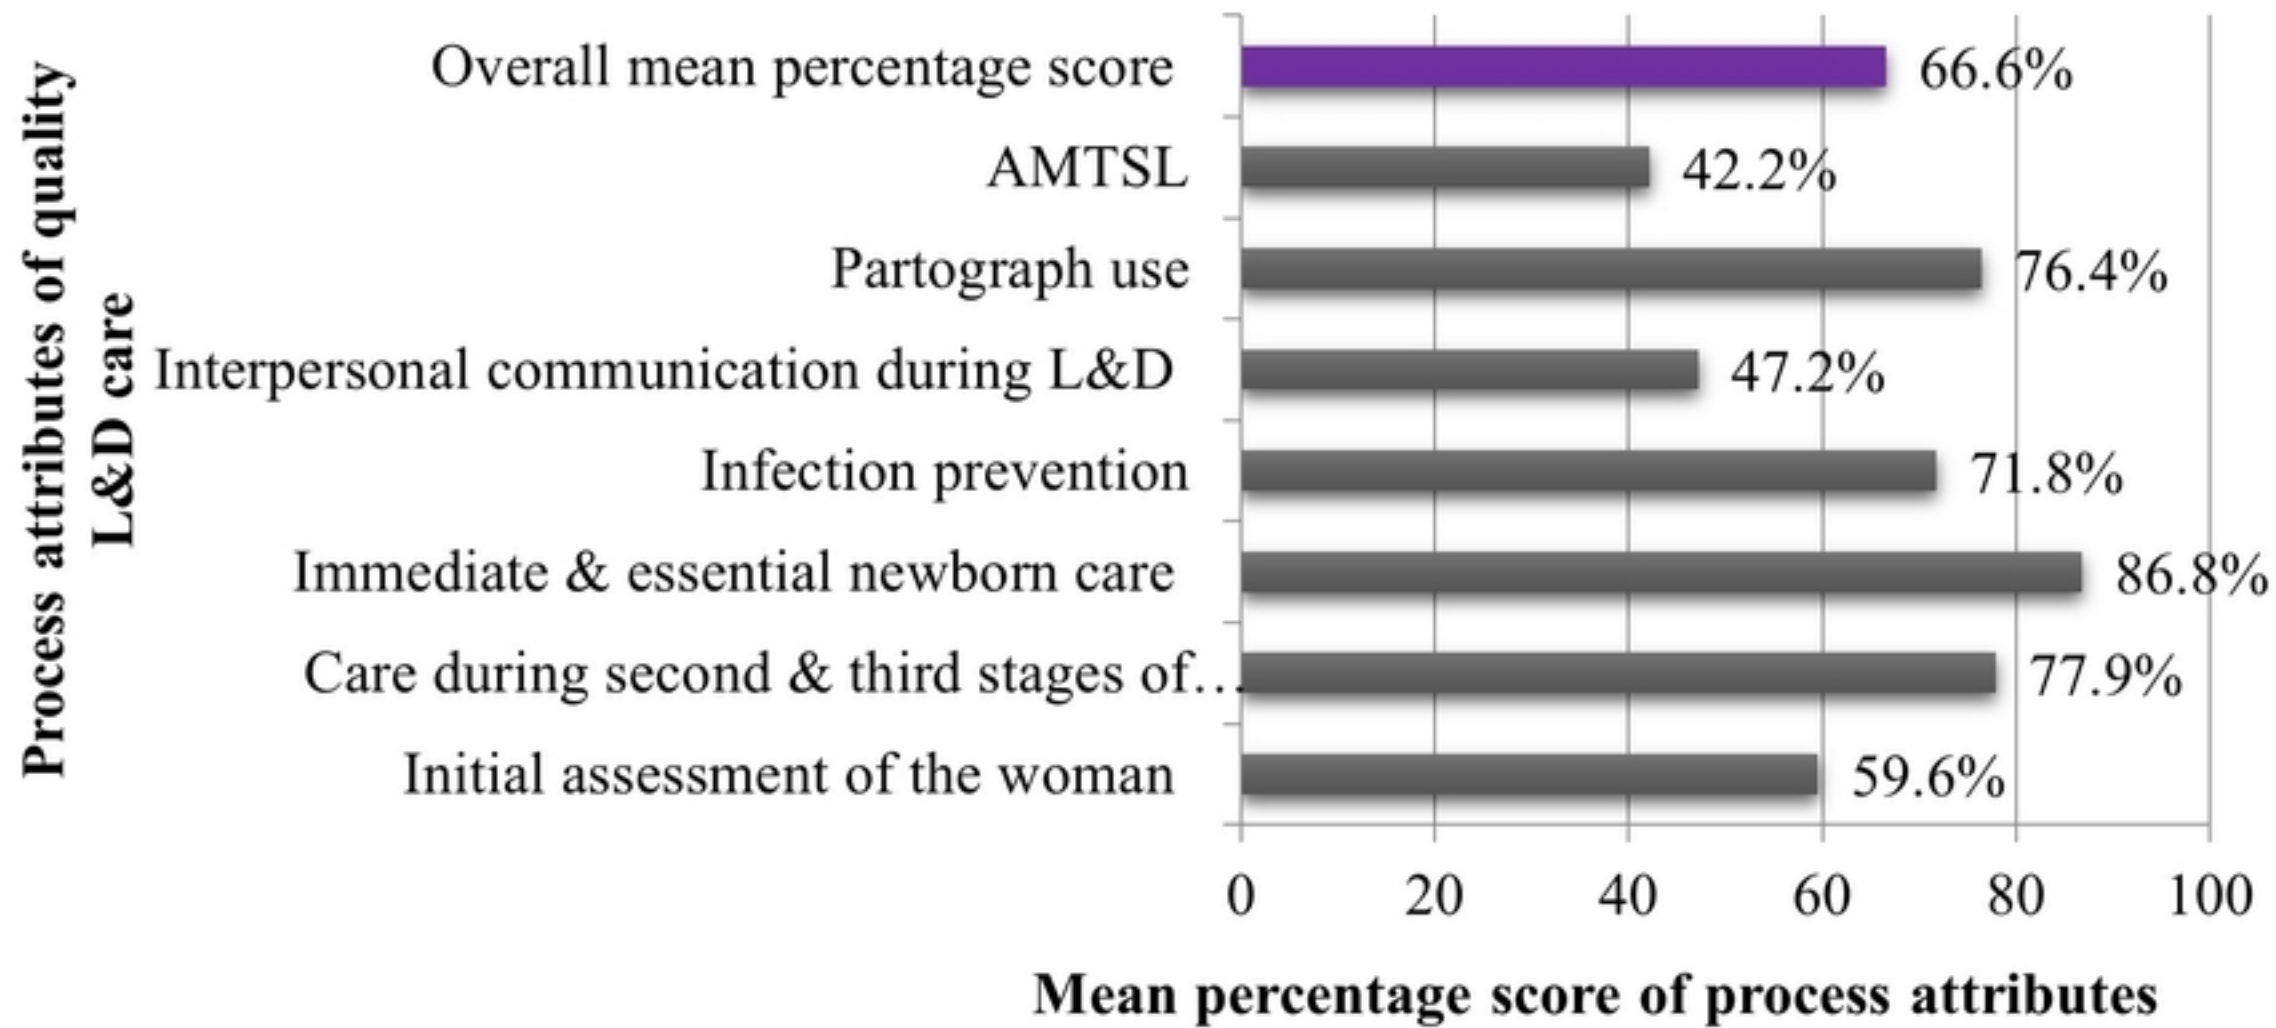

Figure
